# Supplementary material for: Noninvasive disruption of the blood-brain barrier in the marmoset monkey
Source: PubMed Central journal article supplement (PMC10397190; doi:10.1038/s42003-023-05185-3), 2023-08-02
Supplement: 42003_2023_5185_MOESM1_ESM.pdf [file 42003_2023_5185_MOESM1_ESM.pdf]

Supplementary Table 1. Summary of animal age, weight, and sex.

| <b>Common marmoset<br/>(<i>Callithrix jacchus</i>)</b> | <b>Age<br/>(months)</b> | <b>Weight<br/>(grams)</b> | <b>Sex</b> |
|--------------------------------------------------------|-------------------------|---------------------------|------------|
| Marmoset B                                             | 46                      | 205                       | F          |
| Marmoset SP                                            | 32                      | 195                       | F          |
| Marmoset SG                                            | 24                      | 135                       | F          |
| Marmoset SK                                            | 20                      | 170                       | F          |
| Marmoset NE                                            | 29                      | 175                       | M          |
| Marmoset T                                             | 19                      | 145                       | F          |
| Marmoset E                                             | 18                      | 165                       | M          |
| Marmoset G                                             | 40                      | 215                       | F          |
| Marmoset M                                             | 97                      | 235                       | M          |

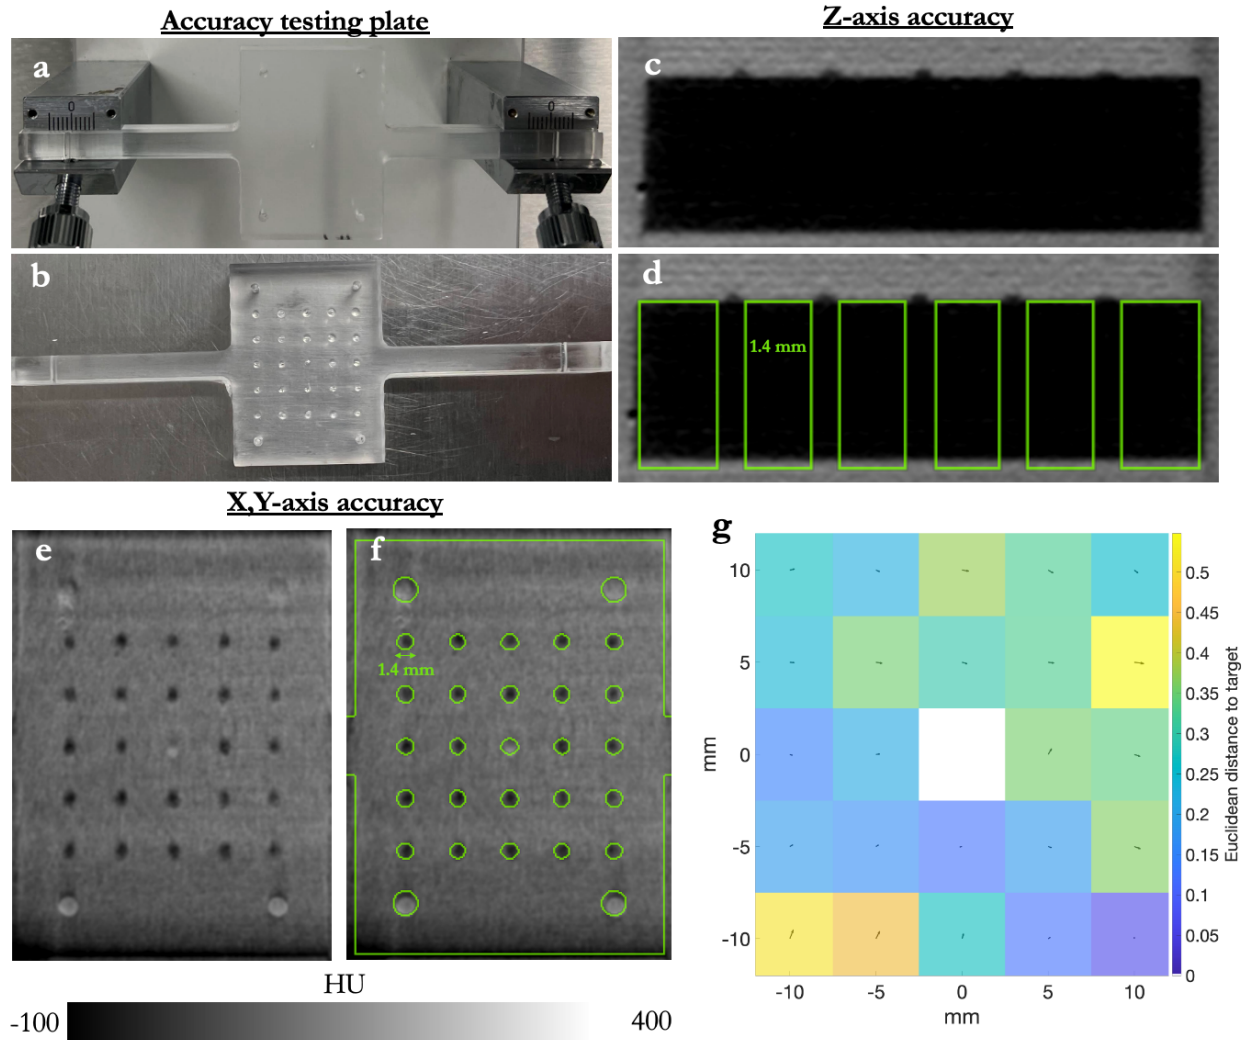

**Supplementary Figure 1.** Testing spatial accuracy via melting acrylic plate. **a** Acrylic test plate apparatus used for testing spatial accuracy. **b** The same plate, but after 24 melted sonication points. **c** CT of the test plane in the Z plane, with the height of the melted point indicating depth accuracy. **d** Target locations for spatial accuracy test. **e** Same CT image as c but in the X-Y plane **f** Target locations from a CAD file registered to CT image **g** Quantification of accuracy – the Euclidean distance between the melted point and target – with each cell representing a melted point across space, with warmer colors indicating greater accuracy error and arrows indicating the magnitude and direction of the error.

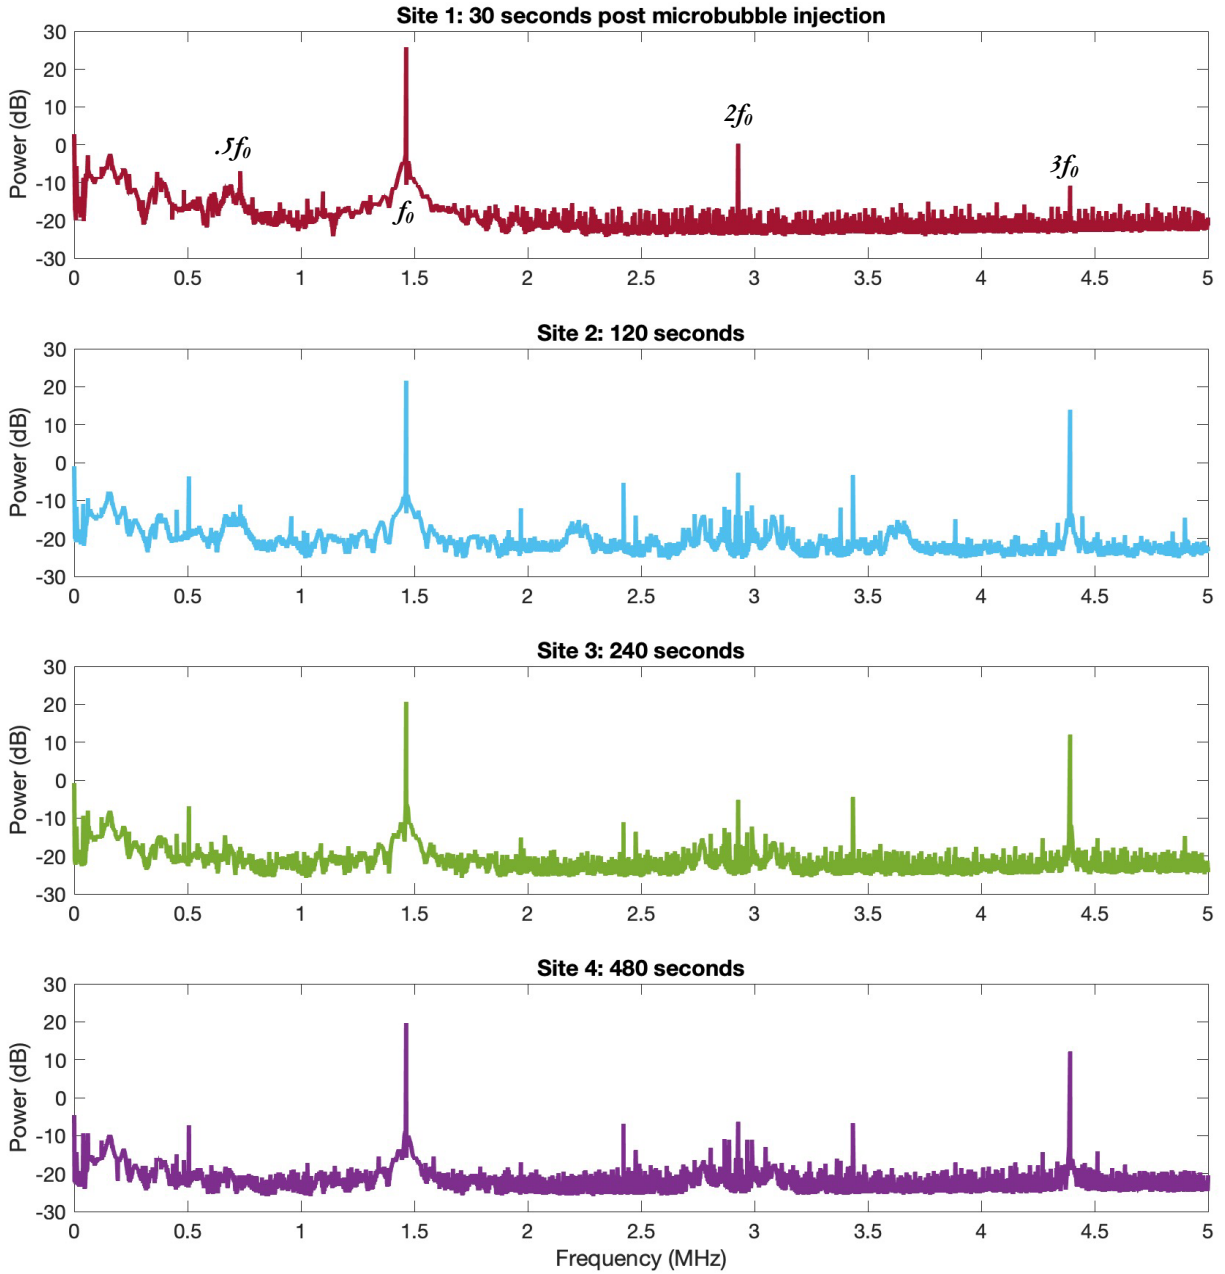

**Supplementary Figure 2.** Frequency spectra from sonications in marmoset T (sites shown in Figure 4) following a single bolus microbubble injection of 200  $\mu\text{l}/\text{kg}$ .

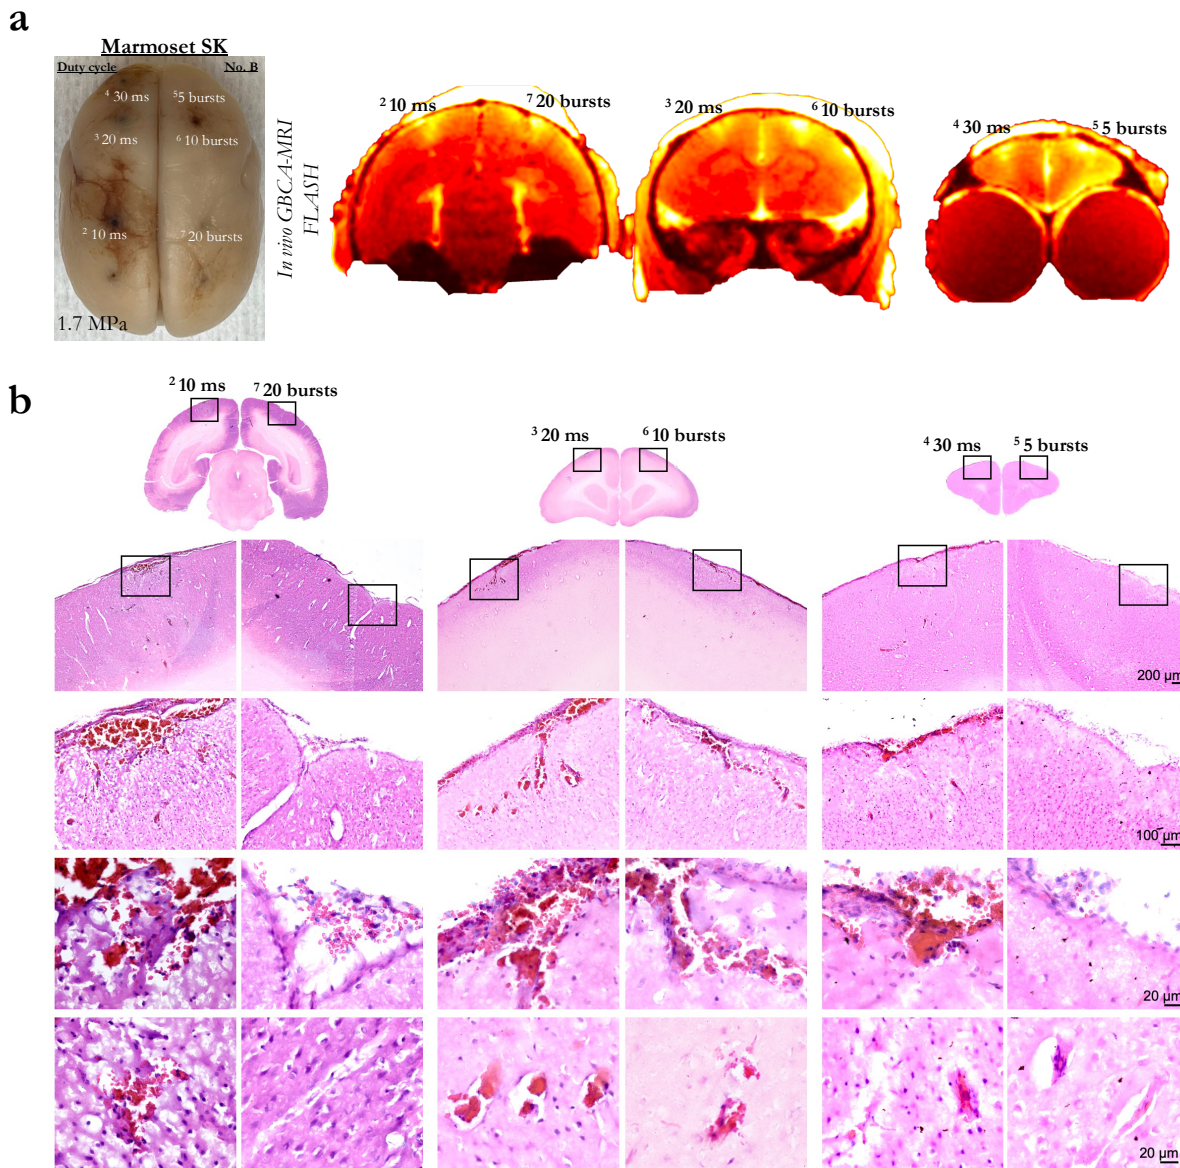

**Supplementary Figure 3.** Tissue caused by high acoustic pressure and microbubble dose. **a** Images derived from Figure 6 for reference for the sonication locations. **b** H & E staining at the sonicated locations, marked by the black boxes and zoomed to 200, 100, 20  $\mu\text{m}$ .
