# Supplementary material for: Noninvasive disruption of the blood-brain barrier in the marmoset monkey
Source: PubMed Central journal article supplement (PMC10397190; doi:10.1038/s42003-023-05185-3), 2023-08-02
Supplement: 42003_2023_5185_MOESM2_ESM.pdf [file 42003_2023_5185_MOESM2_ESM.pdf]

## **Description of Additional Supplementary Files**

**File name:** Supplementary Data 1

**Description:** The source data behind the plots of Figure 9.
